# Supplementary material
Source: Elsevier journal article supplement (https://comptes-rendus.academie-sciences.fr/physique/article/10.1016/j.crhy.2018.11.003/file/attach/mmc1.pdf)

# Re-Interpretation of Old Master practices through optical and rheological investigation: the presence of calcite

L. de Viguier<sup>a</sup>, H. Glanville<sup>a</sup>, G. Ducouret<sup>b</sup>, P. Jacquemot<sup>a,c</sup>, P. Anh Dang<sup>b</sup>, Ph. Walter<sup>a</sup>

a. Sorbonne Université, CNRS, Laboratoire d'Archéologie Moléculaire et structurale, LAMS, F-75005 Paris, France

b. Laboratoire Sciences et Ingénierie de la Matière Molle, CNRS UMR 7615, ESPCI Paris, PSL Research University, 10 rue Vauquelin, F-75231 Paris cedex 05, France

c. Muséum National d'Histoire Naturelle, Sorbonne Université, CNRS, Institut de Minéralogie, Physique des Matériaux et Cosmochimie, F-75005 Paris, France

## SEM observations:

### Results

The first image for each pigment is 24-26  $\mu\text{m}$  in width.

#### I. Chalks

Meudon white (Laverdure)

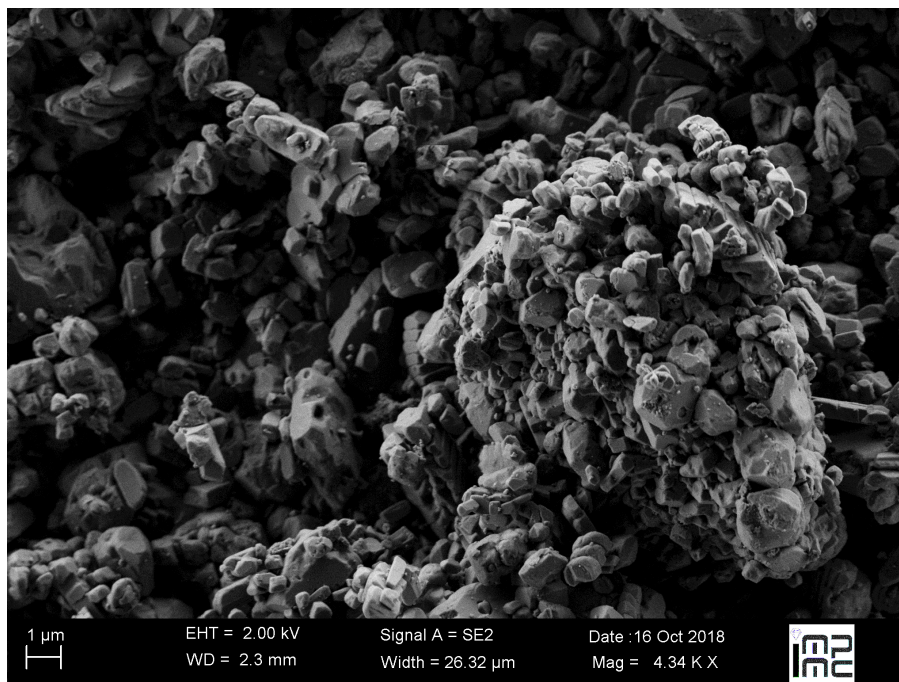

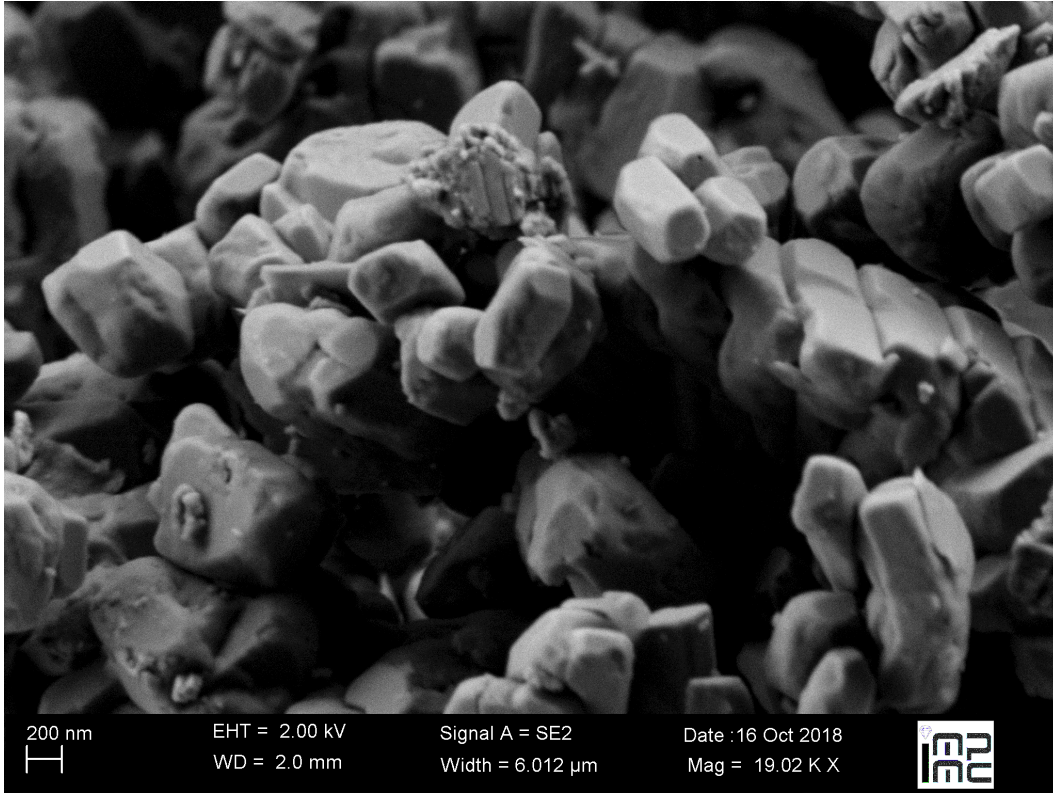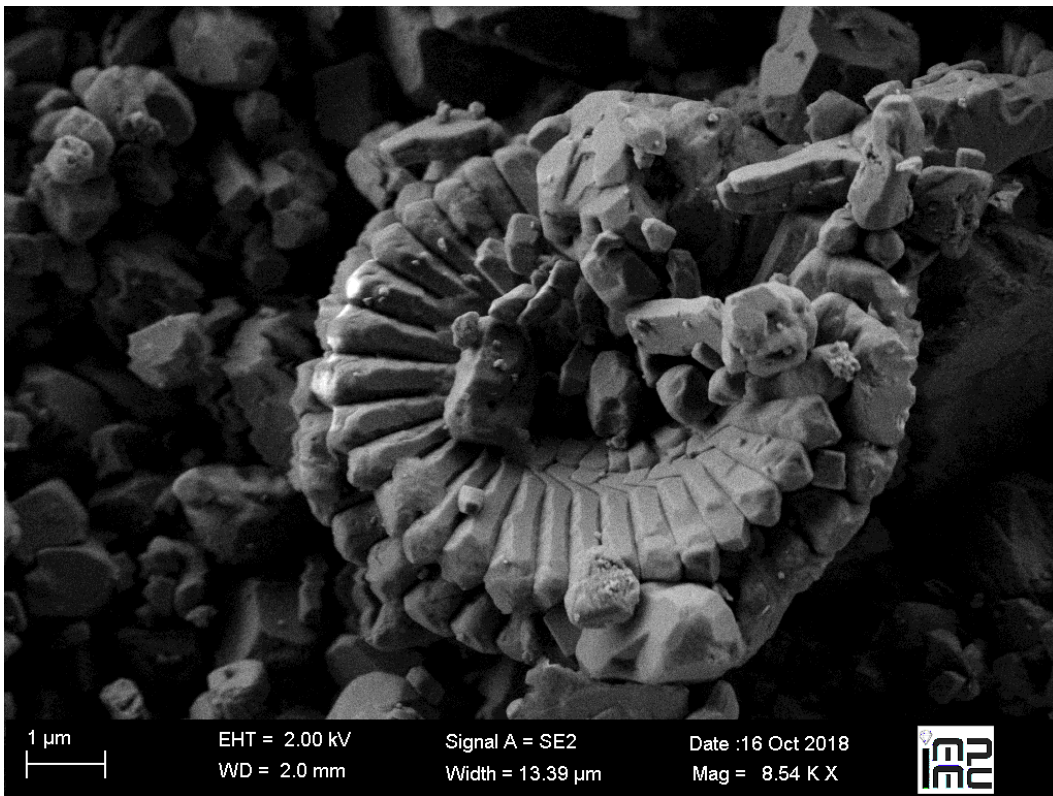

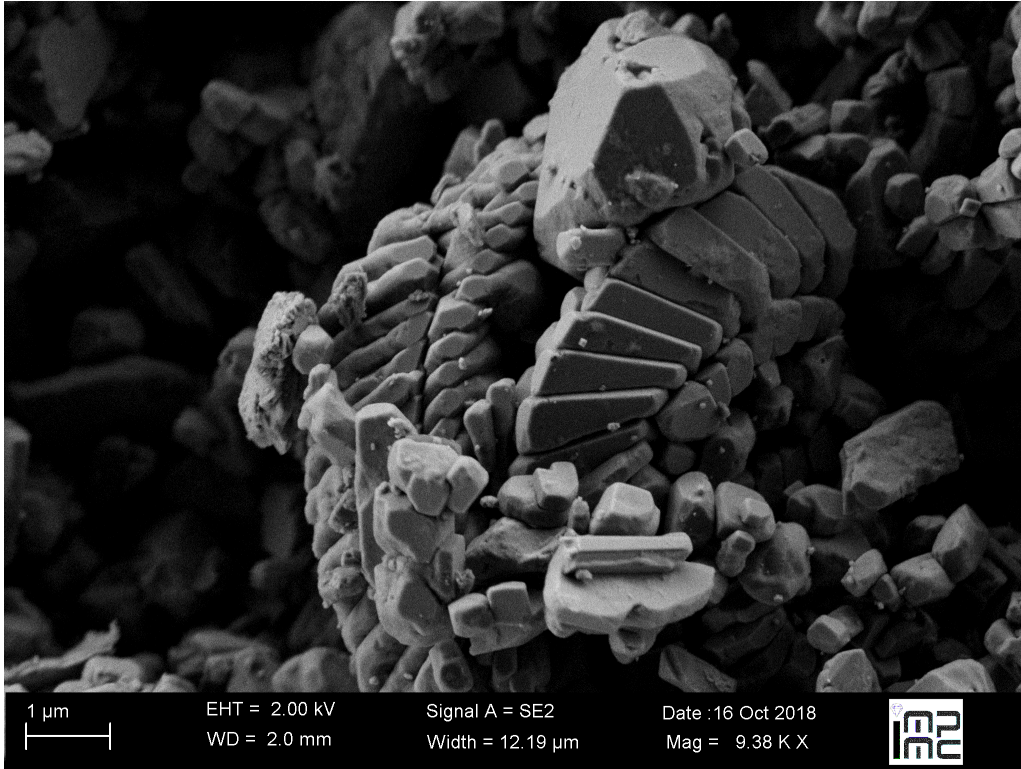

Champagne chalk (from Kremer)

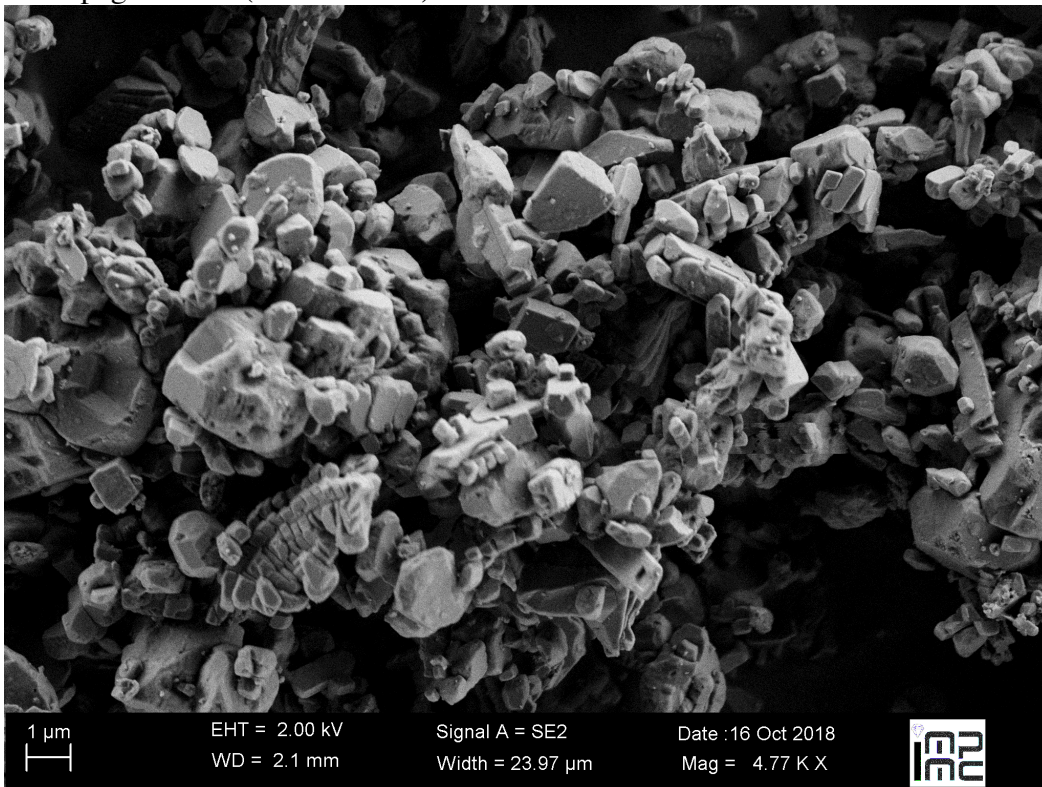

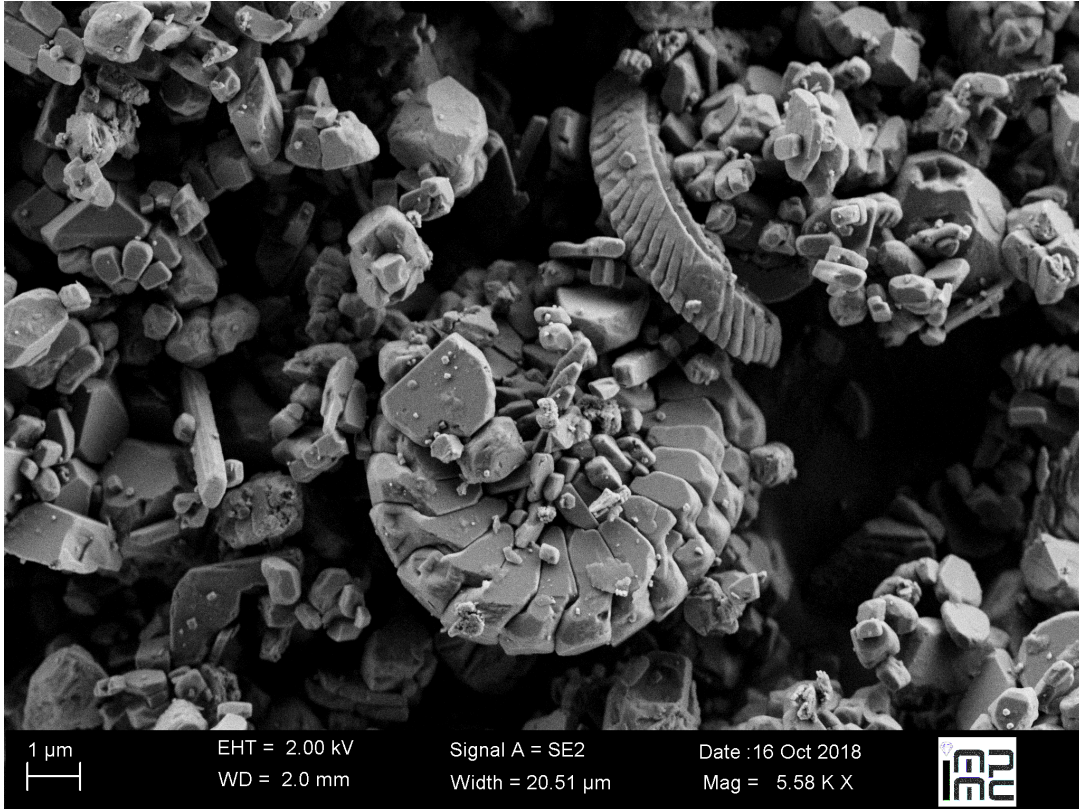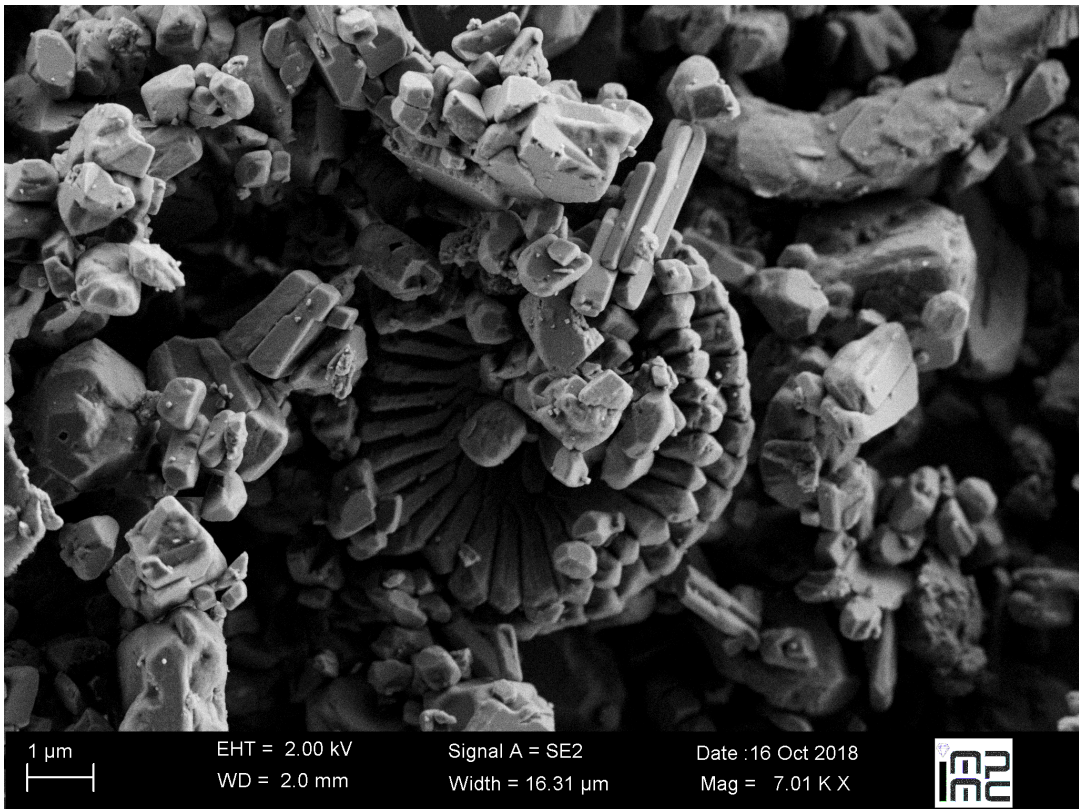

## II. Lead white

Lead white from Master pigments (Flake white)

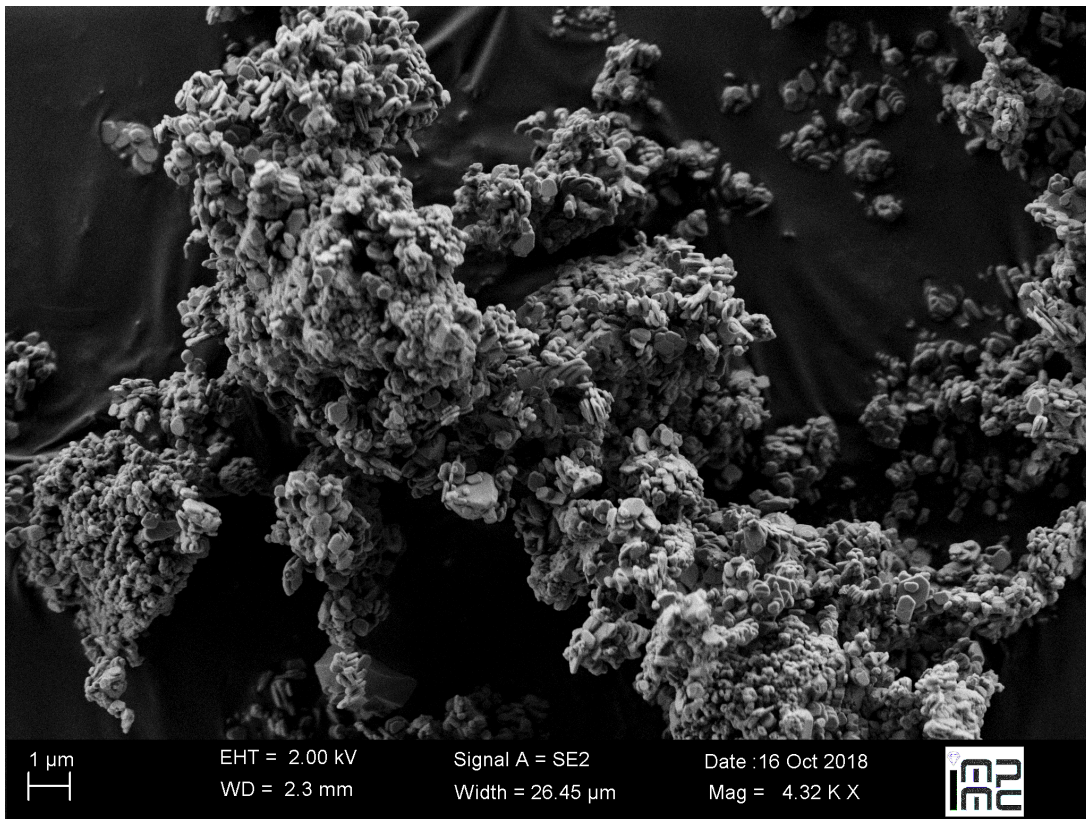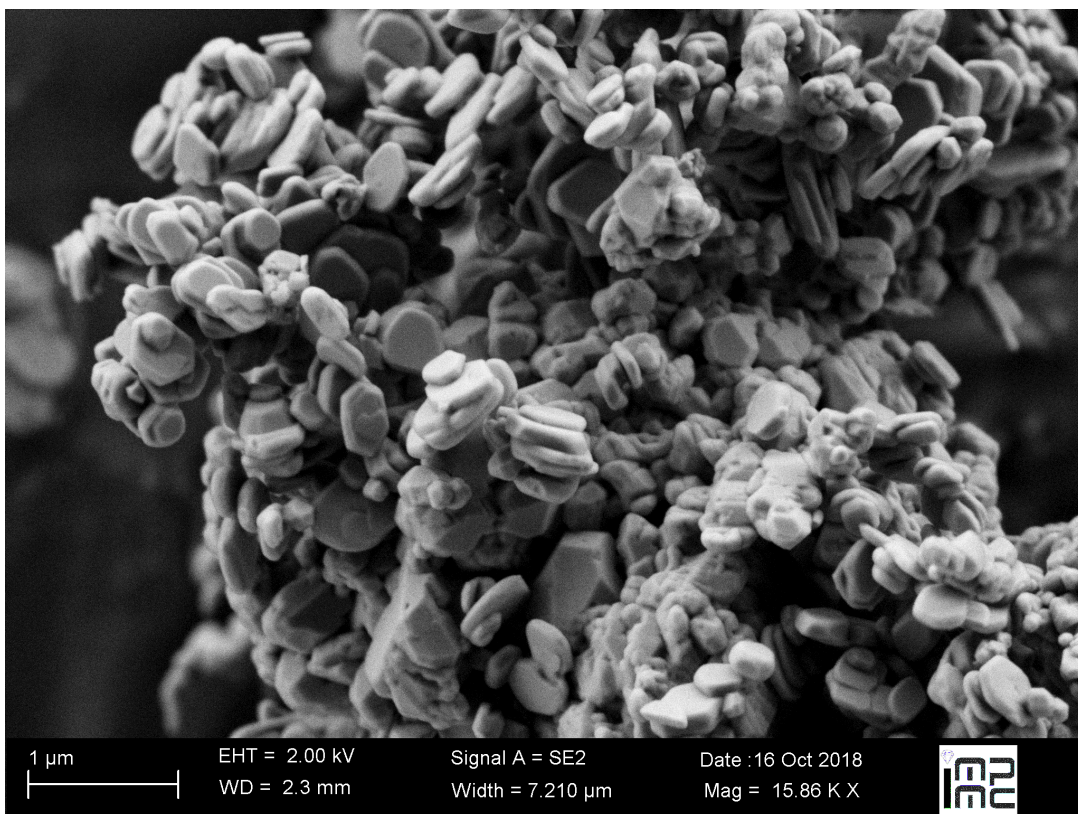

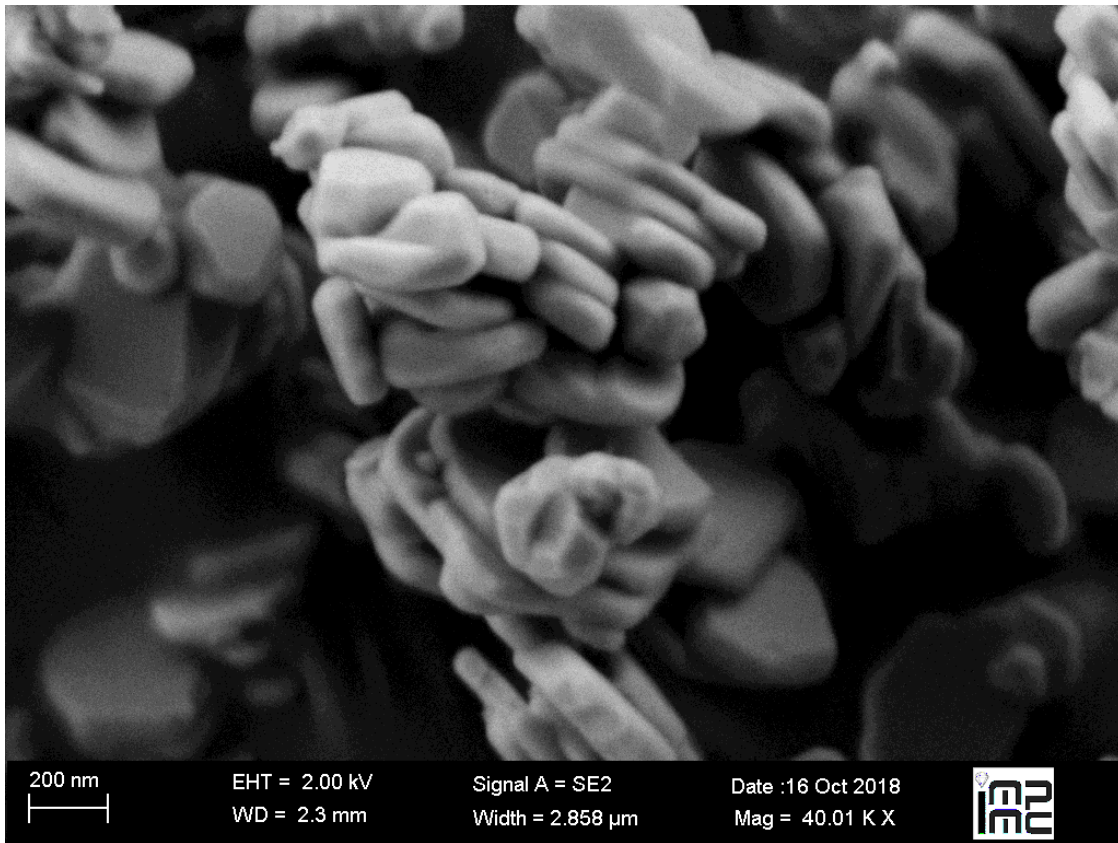

Lead white (Laverdure)

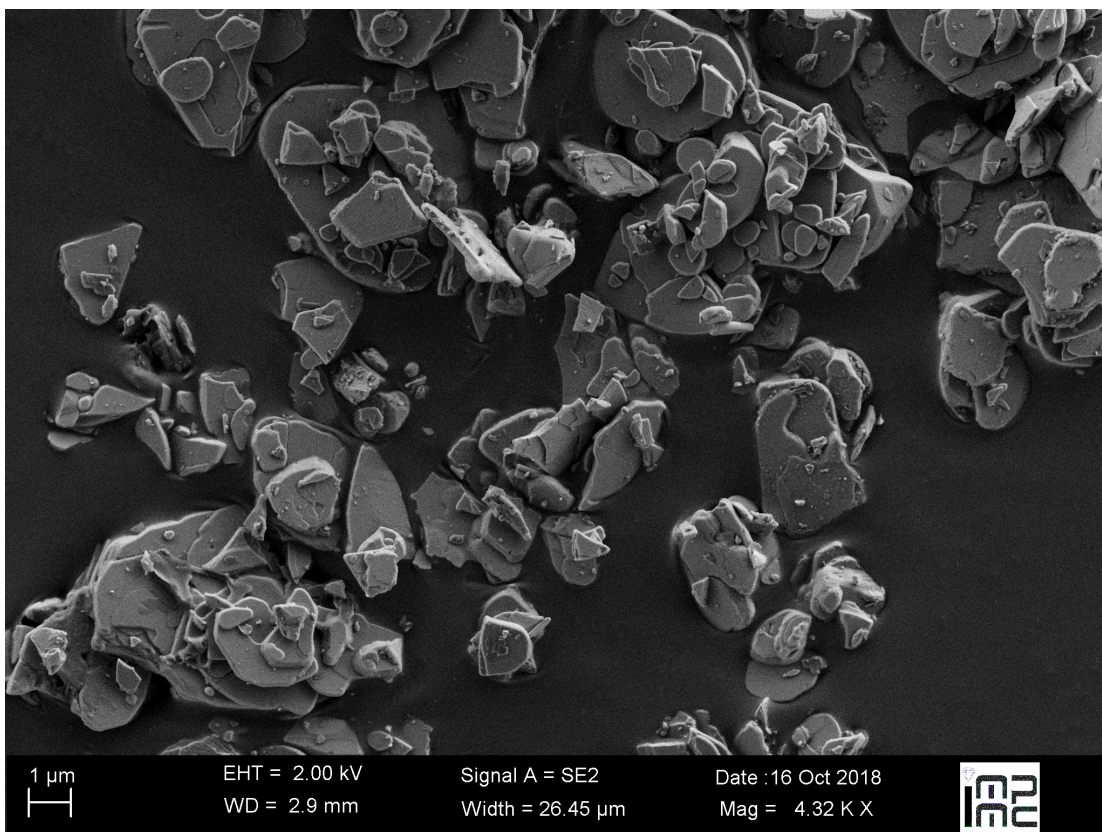

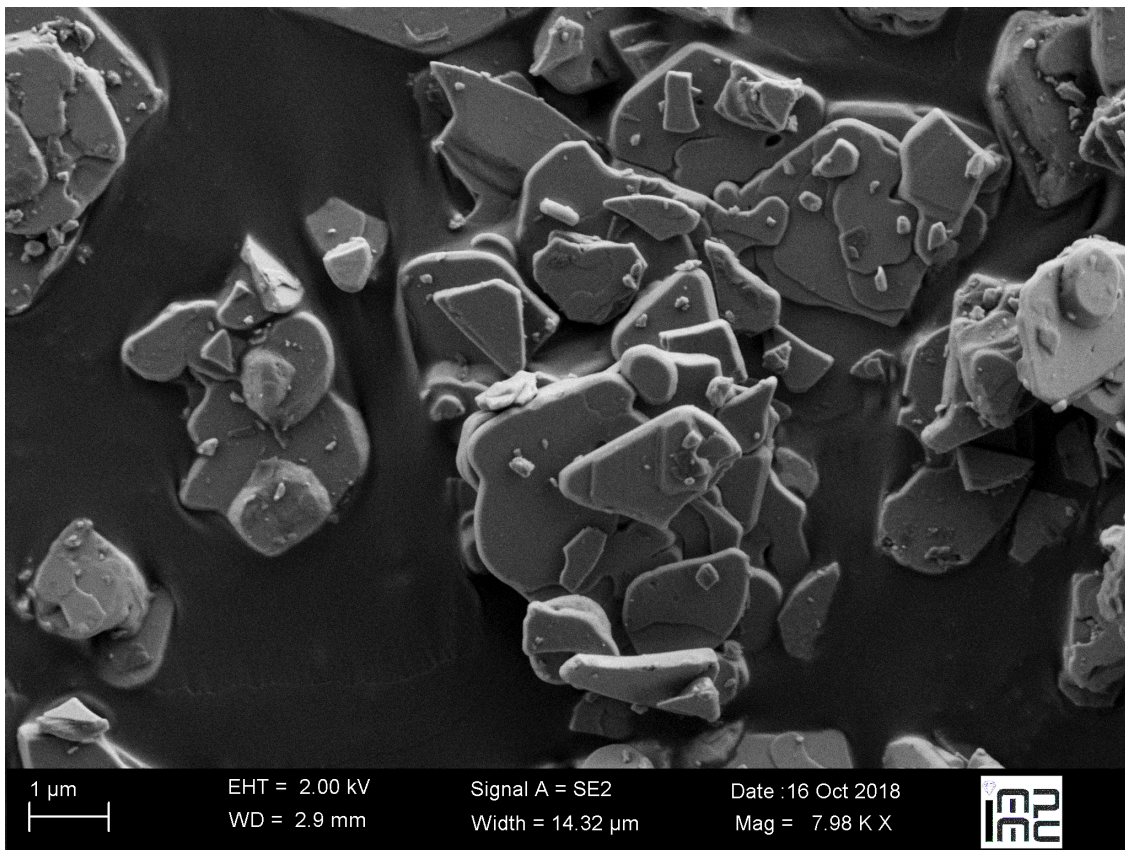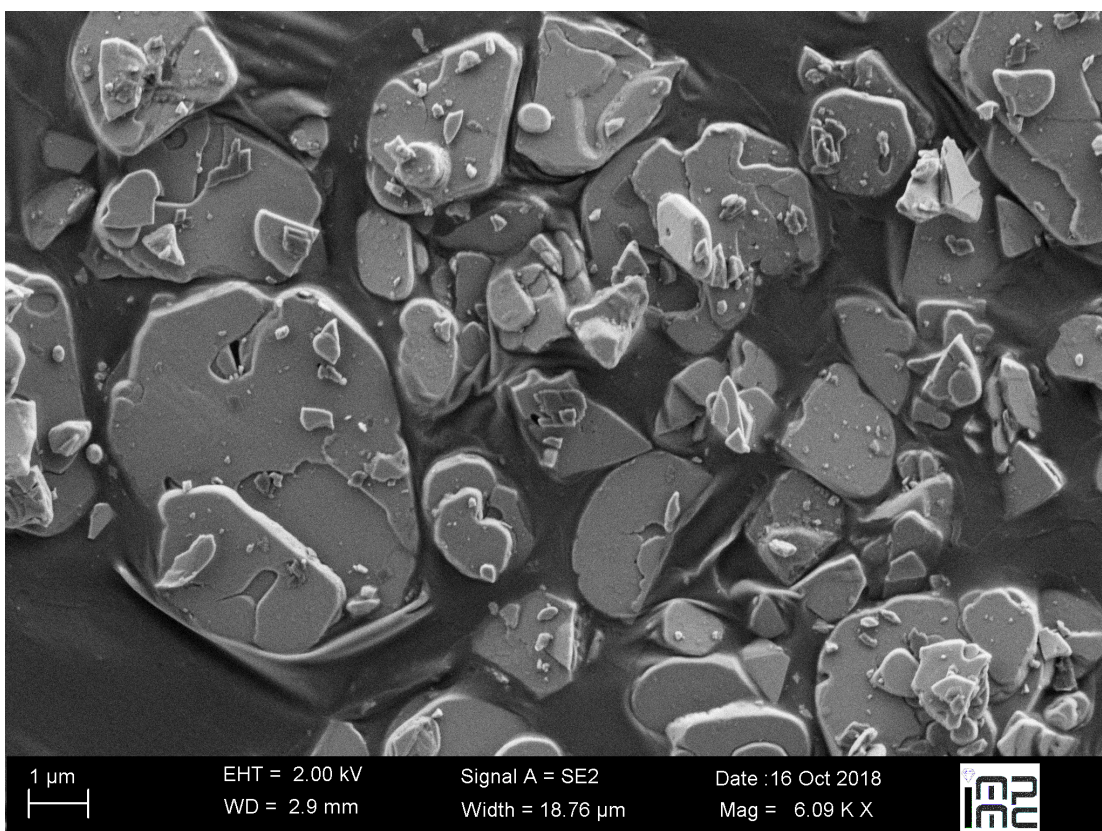

Lead white (Kremer)

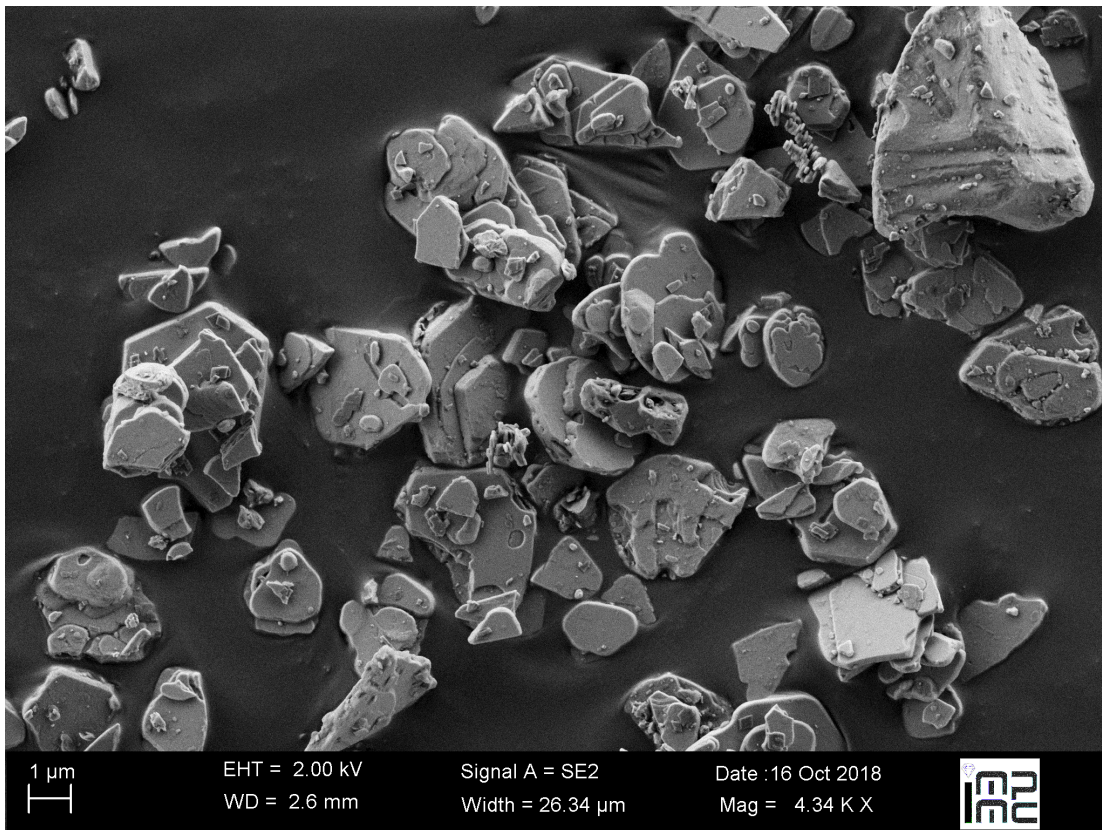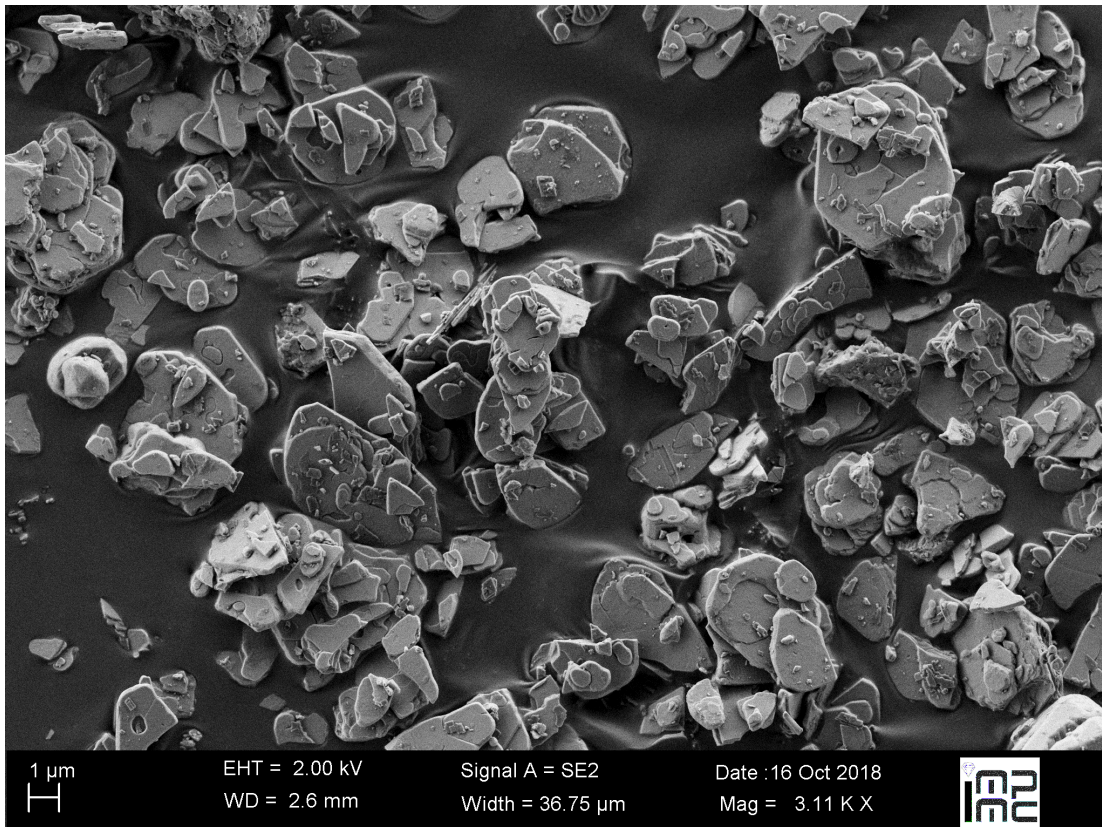



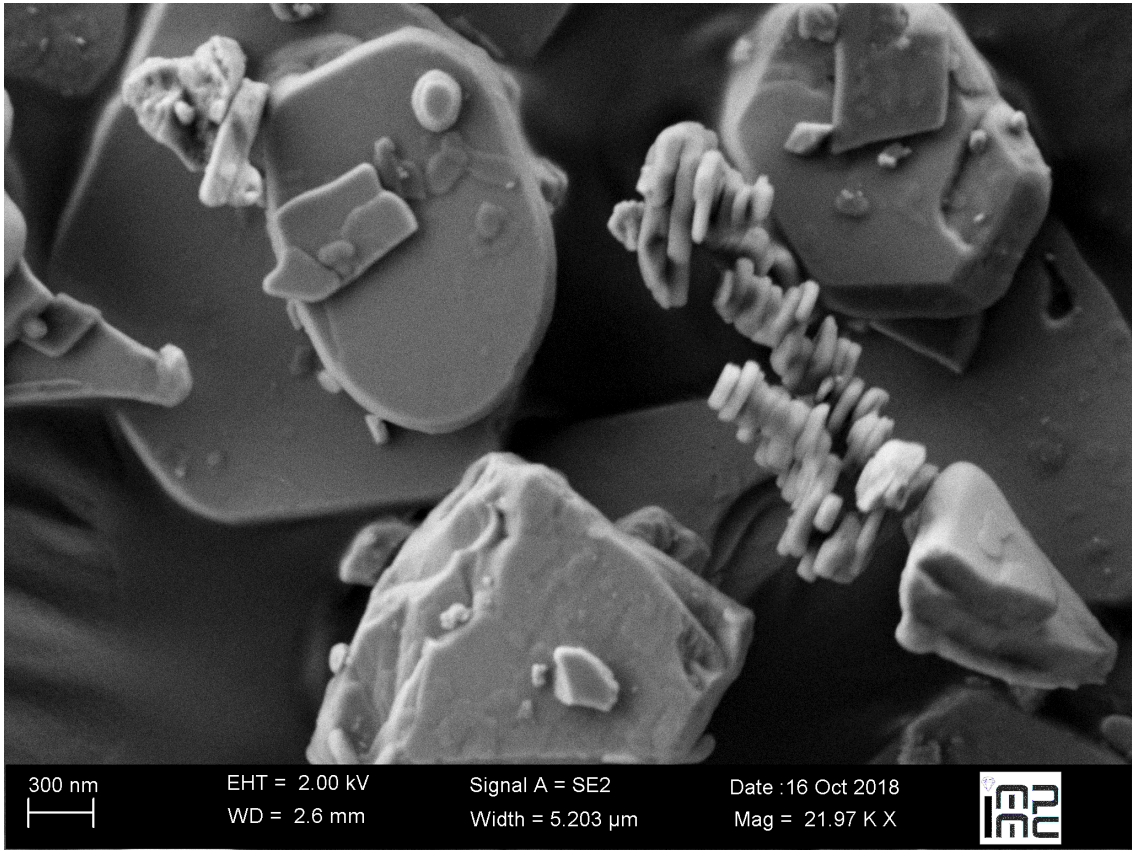

Supplement: mmc1 [file mmc1.pdf]
